# Supplementary material for: Polyamine sensitivity of gap junctions is required for skin pattern formation in zebrafish
Source: PubMed Central journal article supplement — Sci Rep. 2012 Jun 26;2:473. doi: 10.1038/srep00473 (PMC3382735; doi:10.1038/srep00473), 2012-06-26
Supplement: srep00473-s1.pdf [file srep00473-s1.pdf]

## **Supplementary Information**

### **Polyamine sensitivity of gap junctions is required for skin pattern formation in zebrafish**

Masakatsu Watanabe\*, Daisuke Watanabe, and Shigeru Kondo

Graduate School of Frontier Biosciences, Osaka University

1-3 Yamadaoka, Suita, Osaka 565-0871, Japan

\* To whom correspondence should be addressed: [watanabe-m@fbs.osaka-u.ac.jp](mailto:watanabe-m@fbs.osaka-u.ac.jp)

**GJA3**

|            |            |            |
|------------|------------|------------|
| zfCx33.9   | MGDFSSLGKL | LESAQEHSTV |
| zfCx48.5   | MGDWSFLGRL | LENAQEHSTV |
| Pufferfish | MGDWSFLGRL | LENAQEHSTV |
| Frog       | MGDWSFLGRL | LENAQEHSTV |
| Chick      | MGDWSFLGRL | LENAQEHSTV |
| Rat        | MGDWSFLGRL | LENAQEHSTV |
| Cow        | MGDWSFLGRL | LENAQEHSTV |
| Dog        | MGDWSFLGRL | LENAQEHSTV |
| Homo       | MGDWSFLGRL | LENAQEHSTV |

**GJA5**

|            |            |            |
|------------|------------|------------|
| zfCx41.8   | MADWSLLGNF | LEEVQEHSTS |
| zfCx45.6   | MGDWSLLGNF | LEEVQEHSTS |
| Pufferfish | MADWSLLGNF | LEEVQEHSTS |
| Frog       | MGDWSFLGQF | LEEVQKHSTV |
| Chick      | MGDWSFLGEF | LEEVHKHSTV |
| Rat        | MGDWSFLGEF | LEEVHKHSTV |
| Cow        | MGDWSFLGEF | LEEVHKHSTV |
| Dog        | MGDWSFLGEF | LEEVHKHSTV |
| Homo       | MGDWSFLGNF | LEEVHKHSTV |

**GJA8**

|            |            |            |
|------------|------------|------------|
| zfCx44.1   | MGDWSFLGNI | LEEVNEHSTV |
| zfCx50.5   | MGDWSFLGRL | LENAQEHSTV |
| Pufferfish | MGDWSFLGNI | LEEVNEHSTV |
| Frog       | MGDWSFLGNI | LEEVNEHSTV |
| Chick      | MGDWSFLGNI | LEQVNEQSTV |
| Rat        | MGDWSFQGN  | LEEVNEHSTV |
| Cow        | MGDWSFLGNI | LEEVNEHSTV |
| Dog        | MGDWSFLGNI | LEEVNEHSTV |
| Homo       | MGDWSFLGNI | LEEVNEHSTV |

**Supplementary Figure S1 | Alignments of N-terminal domains of connexins from the GJA3, GJA5 and GJA8 groups.**

N-terminal sequences of connexins within the Cx41.8 cluster, which include GJA3, GJA5 and GJA8 members, are aligned. Red characters indicate acidic residues, and blue characters indicate basic residues. Species names are abbreviated as follows: Pufferfish, *Tetraodon nigroviridis*; Frog, *Xenopus tropicalis*; Chick, *Gallus gallus*; Rat, *Rattus norvegicus*; Cow, *Bos taurus*; Dog, *Canis lupus*; Homo, *Homo sapiens*. Accession numbers for each connexin are shown below.

**GJA3:** Tetraodon, CAG00984; Xenopus, NP\_001107721; Chick, NP\_00103573; Rat, NP\_077352; Cow, NP\_00115976; Dog, XP\_54317; Homo, AAD42925.

**GJA5:** Tetraodon, CAG00332; Xenopus, XP\_002940510; Chick, NP\_990835; Rat, NP\_062153; Cow, DAA31637; Dog, AAA30838; Homo, NP\_005257.

**GJA8:** Tetraodon, CAG05866; Xenopus, XP\_002940515; Chick, NP\_990328; Rat, NP\_703195; Cow, DAA31619; Dog, XP\_540274; Homo, NP\_005258.
